# Supplementary material for: TP53-induced glycolysis and apoptosis regulator alleviates hypoxia/ischemia-induced microglial pyroptosis and ischemic brain damage
Source: PubMed Central journal article supplement — Neural Regen Res. 2020 Nov 27;16(6):1037–43. doi: 10.4103/1673-5374.300453 (PMC8224121; doi:10.4103/1673-5374.300453), 2020-11-27
Supplement: NRR-16-1037_Suppl1.pdf [file NRR-16-1037_Suppl1.pdf]

Figure 1

| TIGAR | A HIBD (h) |      |      |      |      |      | B ANIMALTIGAR-SH |       |       | C TTC       |       |        |       | D OGD/R (h) |      |       |             |       |      | E CELL-TIGAR-SH |      |      | F CCK8 |             |      |      |             |      | G OGD/R 24 (h) |      |      |      |      |      |
|-------|------------|------|------|------|------|------|------------------|-------|-------|-------------|-------|--------|-------|-------------|------|-------|-------------|-------|------|-----------------|------|------|--------|-------------|------|------|-------------|------|----------------|------|------|------|------|------|
|       | Sham       | 0    | 1    | 3    | 6    | 12   | 24               | Con   | NC    | LV-sh_TIGAR | Sham  | Mode I | NC    | LV-sh_TIGAR | Con  | NC    | LV-sh_TIGAR | Con   | NC   | LV-sh_TIGAR     | LDH  | Con  | NC     | LV-sh_TIGAR | Con  | NC   | LV-sh_TIGAR |      |                |      |      |      |      |      |
| 0.59  | 0.51       | 0.49 | 0.60 | 0.85 | 0.63 | 1.03 | 0.53             | 0.56  | 0.26  | 0.00        | 20.46 | 20.36  | 39.22 | 0.50        | 0.47 | 0.58  | 0.68        | 0.48  | 0.98 | 1.25            | 1.38 | 0.15 | 2.44   | 2.44        | 2.39 | 1.29 | 1.26        | 0.69 | 0.22           | 0.43 | 0.43 | 1.28 | 1.34 | 1.99 |
| 0.59  | 0.59       | 0.52 | 0.62 | 0.84 | 0.86 | 1.00 | 0.44             | 0.61  | 0.13  | 0.00        | 23.20 | 24.75  | 40.13 | 0.44        | 0.35 | 0.70  | 0.69        | 0.48  | 0.94 | 1.27            | 1.15 | 0.23 | 2.56   | 2.48        | 2.50 | 1.49 | 1.23        | 0.69 | 0.34           | 0.39 | 0.47 | 1.60 | 1.58 | 2.23 |
| 0.55  | 0.60       | 0.53 | 0.56 | 0.88 | 0.72 | 0.99 | 0.68             | 0.68  | 0.07  | 0.00        | 23.55 | 21.33  | 35.45 | 0.48        | 0.35 | 0.71  | 0.59        | 0.45  | 0.97 | 1.07            | 1.23 | 0.26 | 2.31   | 2.32        | 2.44 | 1.50 | 1.52        | 0.88 | 0.45           | 0.31 | 0.56 | 1.44 | 1.01 | 2.36 |
| 0.55  | 0.00       | 0.00 | 0.00 | 0.00 | 0.00 | 0.00 | 0.00             | 19.33 | 19.66 | 35.88       | 0.00  | 21.25  | 20.00 | 38.42       | 0.00 | 22.93 | 23.78       | 39.56 |      |                 |      |      |        |             |      |      |             |      |                |      |      |      |      |      |

Figure 2

| Cas-pase-1 | A HIBD (h) |      |      |      |      |      | B HIBD (h) |      |      |      |      |      | C HIBD (h) |      |      |      |      |      |      |      |    |
|------------|------------|------|------|------|------|------|------------|------|------|------|------|------|------------|------|------|------|------|------|------|------|----|
|            | Sham       | 0    | 1    | 3    | 6    | 12   | 24         | Sham | 0    | 1    | 3    | 6    | 12         | 24   | IL-1 | Sham | 0    | 1    | 3    | 6    | 12 |
| 0.22       | 0.25       | 0.27 | 0.41 | 0.27 | 0.19 | 0.84 | 0.61       | 0.74 | 0.80 | 0.75 | 0.57 | 0.83 | 1.32       | 0.78 | 0.71 | 0.77 | 0.56 | 0.83 | 0.71 | 1.24 |    |
| 0.22       | 0.25       | 0.23 | 0.36 | 0.41 | 0.24 | 0.78 | 0.65       | 0.88 | 0.84 | 0.78 | 0.57 | 1.18 | 1.44       | 0.78 | 0.75 | 0.84 | 0.59 | 0.91 | 0.76 | 1.33 |    |
| 0.22       | 0.24       | 0.27 | 0.35 | 0.27 | 0.20 | 0.76 | 0.56       | 0.87 | 0.87 | 0.80 | 0.61 | 0.96 | 1.45       | 0.79 | 0.71 | 0.77 | 0.74 | 0.85 | 0.67 | 1.28 |    |

| TTC | 0 | 0 | 24.23 | 24.24 | 16.28 | Caspase -1 |      |      |      |      |      | GSDMD -N |      |      |      |      |      | IL-1 | Con  | 0    | 1    | 3    | 6    | 12   | 24   | 2 |
|-----|---|---|-------|-------|-------|------------|------|------|------|------|------|----------|------|------|------|------|------|------|------|------|------|------|------|------|------|---|
|     |   |   |       |       |       | Con        | 0    | 1    | 3    | 6    | 12   | 24       | Con  | 0    | 1    | 3    | 6    |      |      |      |      |      |      |      |      |   |
| 0.  | 0 | 0 | 26.24 | 26.97 | 14.37 | 0.30       | 0.28 | 0.26 | 0.28 | 0.33 | 0.20 | 0.81     | 0.46 | 0.85 | 0.79 | 0.81 | 0.88 | 1.51 | 1.11 | 0.38 | 0.80 | 0.39 | 0.90 | 0.71 | 0.59 | 7 |
| 0.  | 0 | 0 | 24.39 | 25.79 | 14.26 | 0.26       | 0.32 | 0.31 | 0.12 | 0.13 | 0.23 | 0.79     | 0.26 | 0.75 | 0.69 | 0.91 | 0.84 | 1.39 | 1.14 | 0.28 | 0.69 | 0.42 | 1.30 | 0.62 | 0.44 | 6 |
| 0.  | 0 | 0 | 23.66 | 24.00 | 17.57 | 0.28       | 0.15 | 0.14 | 0.08 | 0.08 | 0.30 | 0.80     | 0.35 | 0.84 | 0.63 | 0.97 | 0.95 | 1.24 | 1.37 | 0.35 | 0.65 | 0.53 | 0.97 | 0.86 | 0.47 | 1 |
| 0.  | 0 | 0 | 27.74 | 25.64 | 13.55 |            |      |      |      |      |      |          |      |      |      |      |      |      |      |      |      |      |      |      |      | 4 |
| 0.  | 0 | 0 | 24.09 | 26.39 | 14.02 |            |      |      |      |      |      |          |      |      |      |      |      |      |      |      |      |      |      |      |      | 1 |

| D<br>TIG<br>AR | Con | NC | OGD/R 24 (h) |      |      |               | Caspase -1 | Con  | NC   | OGD/R 24 (h) |      |      |              | IL-1 | Con  | NC   | OGD/R 24 (h) |      |              |      | GSDMD-N | Con  | NC   | OGD/R 24 (h) |               |     |    |
|----------------|-----|----|--------------|------|------|---------------|------------|------|------|--------------|------|------|--------------|------|------|------|--------------|------|--------------|------|---------|------|------|--------------|---------------|-----|----|
|                |     |    | LV-sh_TIG AR | Con  | NC   | LV-sh_TIG GAR |            |      |      | LV-sh_TIG AR | Con  | NC   | LV-sh_TIG AR |      |      |      | Con          | NC   | LV-sh_TIG AR | Con  |         |      |      | NC           | LV-sh_TIG GAR | Con | NC |
| 0.8            | 0   | 0  | 0.78         | 0.19 | 1.45 | 1.28          | 0.20       | 0.36 | 0.41 | 0.38         | 0.72 | 0.69 | 1.24         | 0.38 | 0.38 | 0.40 | 0.85         | 0.82 | 1.27         | 0.43 | 0.33    | 0.27 | 0.96 | 0.89         | 1.38          |     |    |
| 0.7            | 3   | 0  | 0.69         | 0.17 | 1.44 | 1.36          | 0.11       | 0.30 | 0.31 | 0.40         | 0.92 | 1.00 | 1.54         | 0.37 | 0.34 | 0.31 | 0.75         | 0.71 | 1.14         | 0.36 | 0.40    | 0.42 | 0.85 | 0.80         | 1.57          |     |    |
| 0.5            | 9   | 0  | 0.53         | 0.08 | 1.07 | 1.08          | 0.12       | 0.27 | 0.28 | 0.38         | 0.72 | 0.71 | 1.25         | 0.34 | 0.34 | 0.33 | 0.74         | 0.70 | 1.15         | 0.32 | 0.38    | 0.41 | 0.67 | 0.76         | 1.64          |     |    |

| Fig<br>ur<br>e3 | A<br>CCK<br>8 | N | OGD/R 24 (h) |           |                      |      |               |           |                      |    | LDH  | NC   | OGD/R 24 (h) |           |                      |      | C<br>NAD<br>PH | NC   | OGD/R 24 (h) |           |                      |      |              |           |                      |      |      |
|-----------------|---------------|---|--------------|-----------|----------------------|------|---------------|-----------|----------------------|----|------|------|--------------|-----------|----------------------|------|----------------|------|--------------|-----------|----------------------|------|--------------|-----------|----------------------|------|------|
|                 |               |   | LV-sh_TIG AR | NC+NAD PH | LV-sh_TIG GAR+NA DPH | NC   | LV-sh_TIG GAR | NC+NAD PH | LV-sh_TIG GAR+NA DPH | NC |      |      | LV-sh_TIG AR | NC+NAD PH | LV-sh_TIG GAR+NA DPH | NC   |                |      | LV-sh_TIG AR | NC+NAD PH | LV-sh_TIG GAR+NA DPH | NC   | LV-sh_TIG AR | NC+NAD PH | LV-sh_TIG GAR+NA DPH |      |      |
|                 | 0             | 8 | 1.95         | 2.07      | 1.92                 | 1.11 | 0.63          | 1.56      | 1.14                 |    | 0.22 | 0.32 | 0.23         | 0.19      | 1.23                 | 2.50 | 0.52           | 1.54 |              | 0.58      | 0.53                 | 0.90 | 0.83         | 0.44      | 0.11                 | 0.54 | 0.46 |
|                 | 1             | 9 | 1.85         | 1.97      | 2.09                 | 1.18 | 0.72          | 1.45      | 0.95                 |    | 0.49 | 0.43 | 0.33         | 0.30      | 1.56                 | 2.68 | 0.70           | 1.91 |              | 0.61      | 0.63                 | 0.98 | 0.97         | 0.33      | 0.23                 | 0.57 | 0.48 |
|                 | 2             | 0 | 1.90         | 1.97      | 2.01                 | 1.08 | 0.68          | 1.51      | 0.95                 |    | 0.26 | 0.22 | 0.19         | 0.20      | 1.21                 | 2.78 | 0.61           | 1.28 |              | 0.50      | 0.51                 | 1.00 | 0.95         | 0.35      | 0.23                 | 0.57 | 0.53 |

D OGD/R 24 (h) E OGD/R 24 (h)
